# Supplementary material for: Long-term follow-up of neuropsychological functions in patients with high grade gliomas: can cognitive status predict patient’s outcome after surgery?
Source: Springer Nature journal article supplement (doi:10.1007/s00701-020-04230-y), 2020-01-28
Supplement: MOESM1 [file 17602294]

**Long term follow-up of neuropsychological functions in patients with high grade gliomas: can cognitive status predict patient’s outcome after surgery?**

***Supplementarymatherials***

Barbara Zarino1,*, Andrea Di Cristofori2,*, Giorgia Abete Fornara1, Giulio Andrea Bertani1, Marco Locatelli1,3, Manuela Caroli1, Paolo Rampini1,Filippo Cogiamanian4, Davide Crepaldi5, Giorgio Carrabba1

1Unit of Neurosurgery, Fondazione IRCCS Ca' Granda Ospedale Maggiore Policlinico, Milan, Italy.

2Unit of Neurosurgery, Azienda Socio SanitariaTerritoriale – Monza, Ospedale San Gerardo, Monza, Italy

3 University of Milan, Department of Pathophysiology and Transplantation, Italy

4Unit of Neurophysiopathology, Fondazione IRCCS Ca' Granda Ospedale Maggiore Policlinico, Milan, Italy

5Neuroscience Area,Scuola Internazionale Superiore di Studi Avanzati (SISSA), Trieste, Italy

*The first two authors contributed equally to the study and should therefore be considered as first co-authors

**Correspondence should be addressed to:**

Barbara Zarino

Division of Neurosurgery, Fondazione I.R.C.C.S. "Ca' Granda" Ospedale Maggiore Policinico, Via Francesco Sforza 35 (Padiglione Monteggia), 20122 Milano, Italy

Andrea Di CristoforiDivision of Neurosurgery, Azienda Socio Sanitaria Territoriale – Monza, Ospedale San Gerardo Via Pergolesi 33, 20900 Monza (MB), Italy

| **MIBIB** | | |
| --- | --- | --- |
|
| **Cognitive domain** | **Neuropsychological test** | **Function tested** |
| Language | Picture naming of objects (Catricalà et al., 2008)[11] | Objects naming |
| Picture naming of actions (standardization in progress) | Action (verbs) naming |
| Semantic verbal fluency (Novelli et al., 1986)[10] | Lexical access; search strategies; flexibility |
| Phonemic verbal fluency (Zarino et al., 2013)[15] | Lexical access; semantic lexical amplitude; search strategies; flexibility |
| Picture naming of people (Rizzo et al., 2002)[12] | Facial recognition and naming of famous people |
| Token test (De Renzi et al., 1978)[5] | Complex verbal comprehension; verbal short-term memory |
| Sentence repetition (Miceli et al., 1994)[11] | Repetition of phrases; verbal short-term memory |
| Word repetition (Miceli et al., 1994)[11] | Repetition of words |
| Non-word repetition (Miceli et al., 1994)[12] | Repetition of non-words |
| Memory | Digit span forward (Monaco et al., 2013)[9] | Short-term verbal memory |
| Digit span backward (Monaco et al., 2013)[9] | Verbal working memory |
| Corsi spanforward (Monaco et al., 2013)[9] | Visuo-spatial short-term memory |
| Rey 15-word list (Carlesimo et al., 1996)[3, 11] | Short- and long-term verbal memory |
| Rey complex figure recall (Carlesimo et al., 2002; Casarotti et al., 2014)[3, 4] | Visuo-spatial long-term memory |
| Attention and executive functions | Attentive matrices (Giovagnoli et al., 1996)[7] | Selective and divided attention |
| Trail making test (Giovagnoli et al., 1996)[7] | Visual processing search; recognition and reproduction of numerical sequences; motor seed; attentional shifting; divided attention |
| Stroop test (short version) (Caffarra et al., 2012)[2] | Selective attention; flexibility; processing speed; inhibitory mechanisms |
| Raven coloured progressive matrices (Basso et al., 1987)[1] | Non-verbal reasoning |
| Weigl test (Spinnler et al., 1987)[14] | Abstraction and categorization |
| Wisconsin card sorting test (Laiacona et al., 2000)[8] | Reasoning; shifting cognitive strategies; problem solving; perseverative behavior |
| Praxis | Rey complex figure reproduction/Taylor complex figure reproduction (Carlesimo et al., 2002; Casarotti et al., 2014)[3, 4] | Constructional apraxia |
| Ideomotor Apraxia test (De Renzi et al., 1980)[6] | Ideomotor apraxia |
| Orofacial Apraxia test (De Renzi et al., 1980)[6] | Orofacial apraxia |
| Spatial cognition | Line bisection (Ronchi et al., 2009)[13] | Spatial perception and exploration |
| Star cancellation (Ronchi et al., 2009)[13] |
| Letter cancellation (Ronchi et al., 2009)[13] |
| Reading of sentences (Ronchi et al., 2009)[13] |
| Drawing (Ronchi et al., 2009)[13] |

**Table 1sm:** Cognitive domains and relative neuropsychological tests and functions assessed.


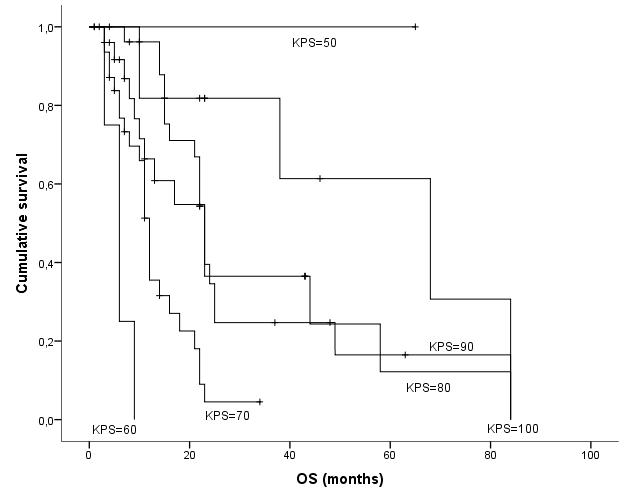


**Figure 1_sm.** Kaplan-Meyer curves showing the relationship between KPS scores and OS.


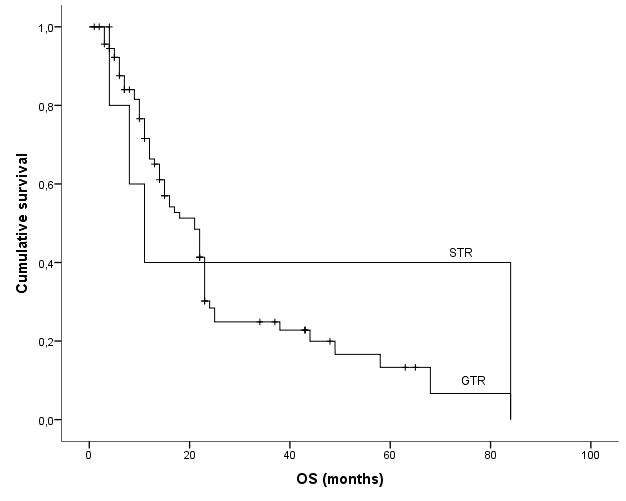


**Figure 2_sm.** Kaplan-Meyer curves showing the relationship between kind of surgery (Gross Total Resection vs Sub Total Resection) and OS.


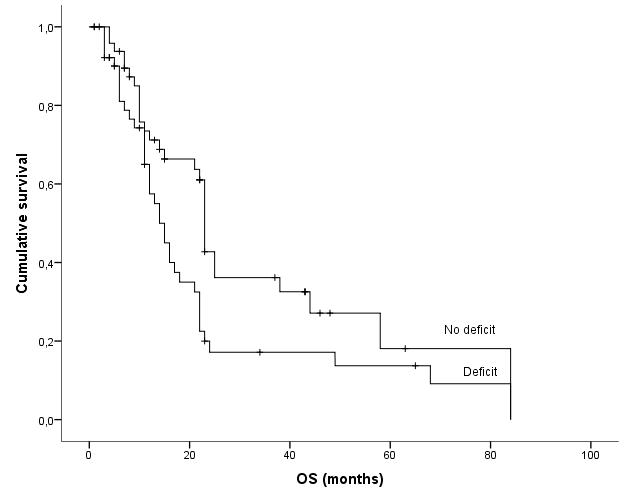


**Figure 3_sm.** Kaplan-Meyer curves showing the relationship between the presence or absence of a neurological deficit and OS.

**
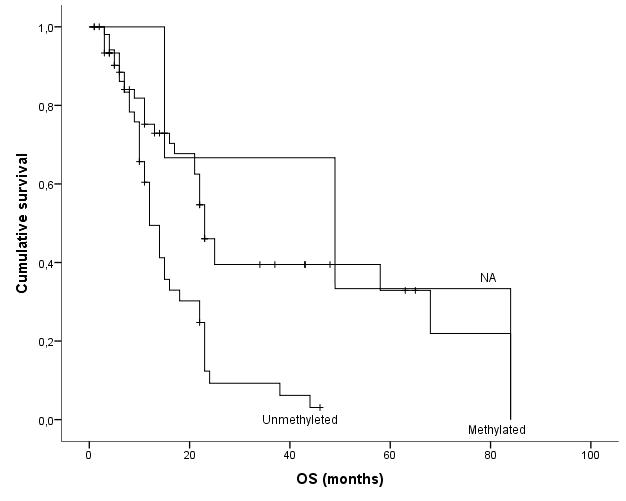
**

**Figure 4_sm.** Kaplan-Meyer curves showing the relationship between MGMT methylation and OS.(NA= notavailable)


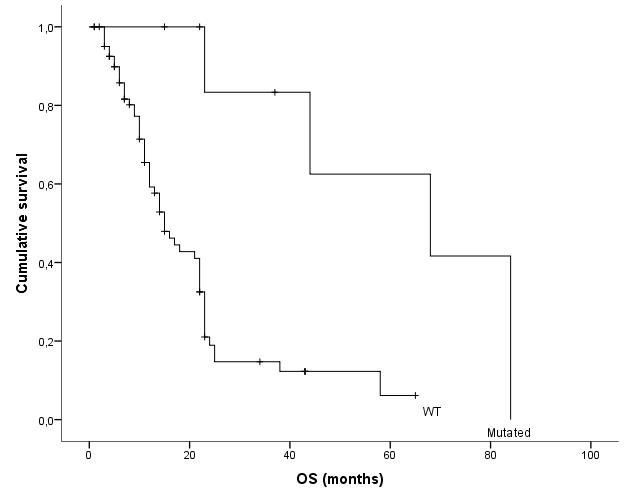


**Figure 5_sm.** Kaplan-Meyer curves showing the relationship between IDH and OS (WT=wild type).


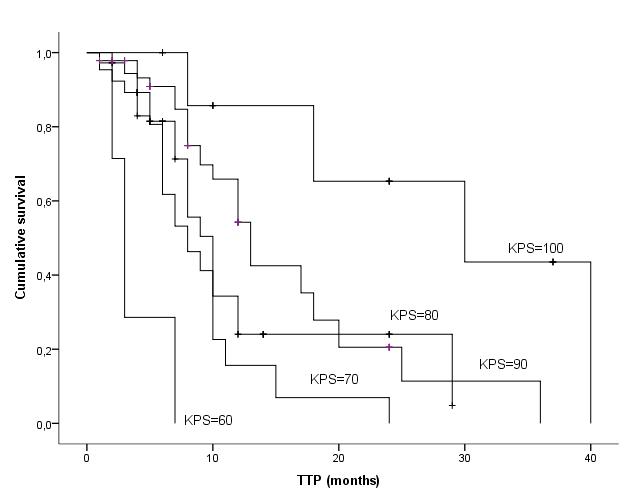


**Figure 6_sm.** Kaplan-Meyer curves showing the relationship between KPS and TTP.


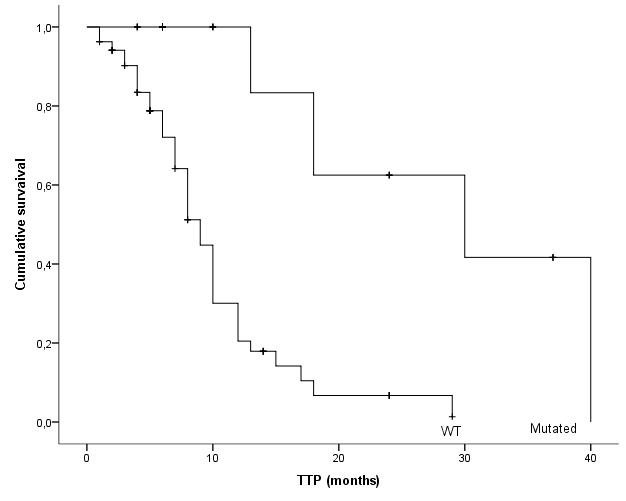


**Figure 7_sm.** Kaplan-Meyer curves showing the relationship between IDH and TTP (WT=wild tipe).

**REFERENCES**

1. Basso A, Capitani E, Laiacona M (1987) Raven’s coloured progressive matrices: normative values on 305 adult normal controls. Funct Neurol 2(2):189–194

2. Caffarra P, Vezzadini G, Francesca D, Zonato F, Venneri A (2012) Una versione abbreviata del test di Stroop: dati normativi nella popolazione italiana.

3. Carlesimo G, Buccione I, Fadda L, Graceffa A, Mauri M, Lorusso S, Bevilacqua G, Caltagirone C (2002) Normative data of two memory tasks: Short-Story recall and Rey’s Figure.

4. Casarotti A, Papagno C, Zarino B (2014) Modified Taylor Complex Figure: normative data from 290 adults. J Neuropsychol 8(2):186–198

5. De Renzi E, Faglioni P (1978) Normative data and screening power of a shortened version of the Token Test. Cortex J Devoted Study Nerv Syst Behav 14(1):41–49

6. De Renzi E, Motti F, Nichelli P (1980) Imitating gestures. A quantitative approach to ideomotor apraxia. Arch Neurol 37(1):6–10

7. Giovagnoli AR, Del Pesce M, Mascheroni S, Simoncelli M, Laiacona M, Capitani E (1996) Trail making test: normative values from 287 normal adult controls. Ital J Neurol Sci 17(4):305–309

8. Laiacona M, Inzaghi MG, De Tanti A, Capitani E (2000) Wisconsin card sorting test: a new global score, with Italian norms, and its relationship with the Weigl sorting test. Neurol Sci Off J Ital Neurol Soc Ital Soc Clin Neurophysiol 21(5):279–291

9. Monaco M, Costa A, Caltagirone C, Carlesimo GA (2013) Forward and backward span for verbal and visuo-spatial data: standardization and normative data from an Italian adult population. Neurol Sci Off J Ital Neurol Soc Ital Soc Clin Neurophysiol 34(5):749–754

10. Novelli G, Papagno C, Capitani E, Laiacona M, et al (1986) Tre test clinici di ricerca e produzione lessicale. Taratura su sogetti normali. [Three clinical tests to research and rate the lexical performance of normal subjects.]. Arch Psicol Neurol Psichiatr 47(4):477–506

11. Papagno C, Casarotti A, Comi A, Gallucci M, Riva M, Bello L (2012) Measuring clinical outcomes in neuro-oncology. A battery to evaluate low-grade gliomas (LGG). J Neurooncol 108(2):269–275

12. Rizzo S, Venneri A, Papagno C (2002) Famous face recognition and naming test: a normative study. Neurol Sci 23(4):153–159

13. Ronchi R, Posteraro L, Fortis P, Bricolo E, Vallar G (2009) Perseveration in left spatial neglect: Drawing and cancellation tasks. Cortex 45(3):300–312

14. Spinnler, H, Tognoni, G (1987) [Italian standardization and classification of Neuropsychological tests. The Italian Group on the Neuropsychological Study of Aging]. Ital J Neurol Sci Suppl 8:1–120

15. Zarino B, Crespi M, Launi M, Casarotti A (2014) A new standardization of semantic verbal fluency test. Neurol Sci 35(9):1405–1411
